# Supplementary material for: Optogenetics-based localization of talin to the plasma membrane promotes activation of β3 integrins
Source: PubMed Central journal article supplement (PMC8131925; doi:10.1016/j.jbc.2021.100675), 2021-04-16
Supplement: mmc1.pdf [file mmc1.pdf]

Supplementary Information for

**Optogenetic-based Localization of Talin to the Plasma Membrane Promotes Activation of  $\beta$ 3 Integrins**

Zhongji Liao<sup>a</sup>, Alexandre R. Gingras<sup>a</sup>, Frederic Lagarrigue<sup>a</sup>, Mark H. Ginsberg<sup>a</sup>, and Sanford J. Shattil<sup>a</sup>

<sup>a</sup>Department of Medicine, University of California, San Diego, La Jolla, CA 92093

To whom correspondence may be addressed. Email: zhliao@health.ucsd.edu or sshattil@health.ucsd.edu.

**This PDF file includes:**

Figures S1 to S7  
Legends for Figures S1 to S7

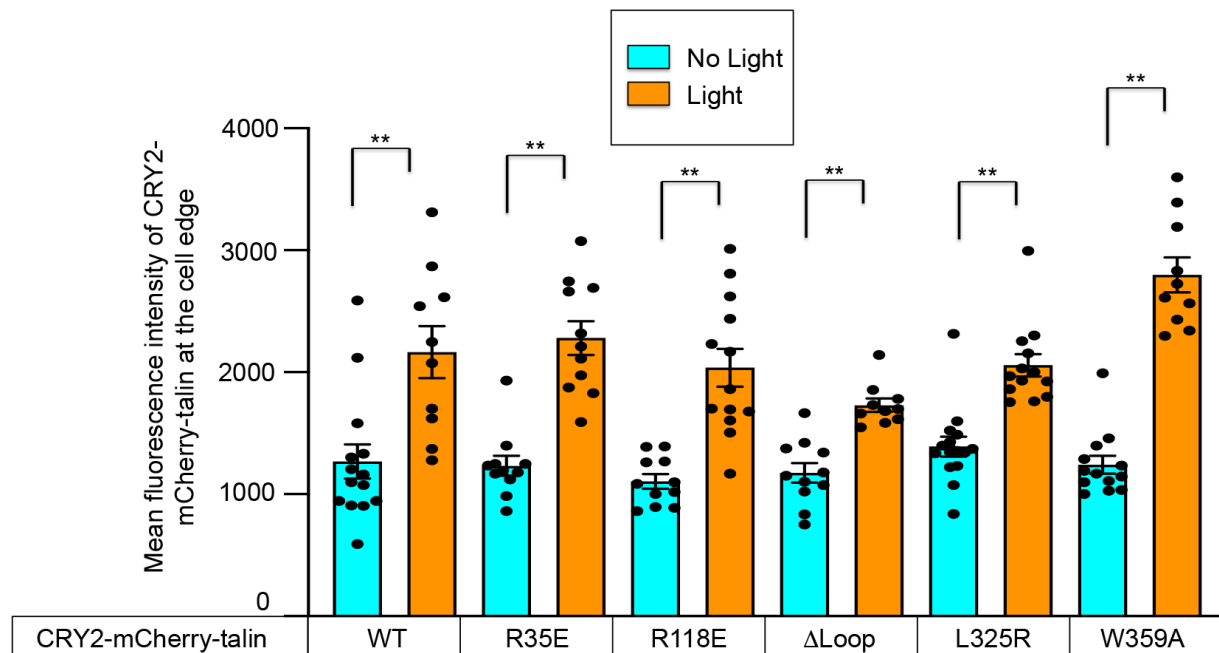

**Figure S1.** Optogenetic recruitment of talin to the plasma membrane in A5 cells expressing various talin mutants. CIBN-GFP-CAAX was co-expressed in A5 cells with either CRY2-mCherry-wild-type talin or one of the indicated CRY2-mCherry talin mutants. Cells were trypsinized and resuspended before exposure to pulsed blue light for 30 minutes with a frequency of 1 s each 75 seconds. CIBN-GFP-CAAX and CRY2-mCherry-talin in fixed cells were visualized by confocal imaging. Since CIBN-GFP-CAAX was located at the cell edge in the suspended cells, recruitment of CRY2-mCherry-talin by CIBN-GFP-CAAX was quantified as changes of mCherry intensity at cell edges. mCherry intensities were measured on subareas of cell edges that were GFP-positive. Increased fluorescence intensity of mCherry was observed at cell edges in response to blue light. Data represent means  $\pm$  SEM from 10-15 cells in each of two independent experiments (double asterisk,  $P < 0.01$ ).

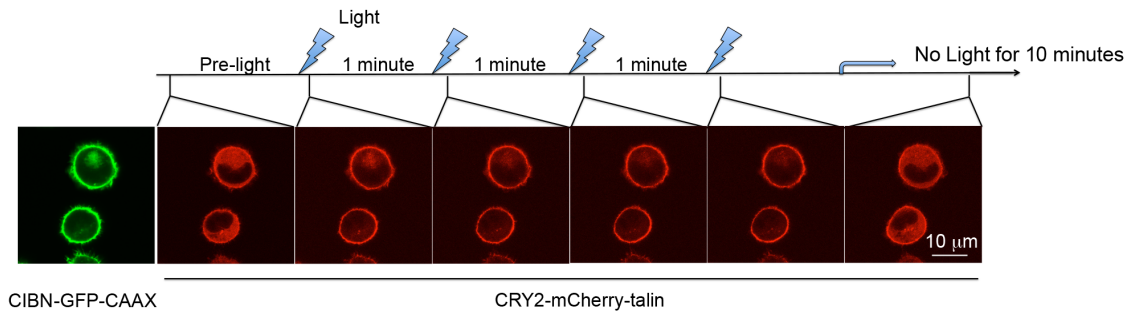

**Figure S2.** Real time-lapse images of suspended A5 CHO cells expressing CRY2-mCherry-talin and CIBN-GFP-CAAX before and after illumination by 450 nm blue light for the indicated times. Note the rapid optogenetic recruitment of CRY2-mCherry-talin to the plasma membrane and its reversal upon removal of illumination. Scale bar: 10 μm.

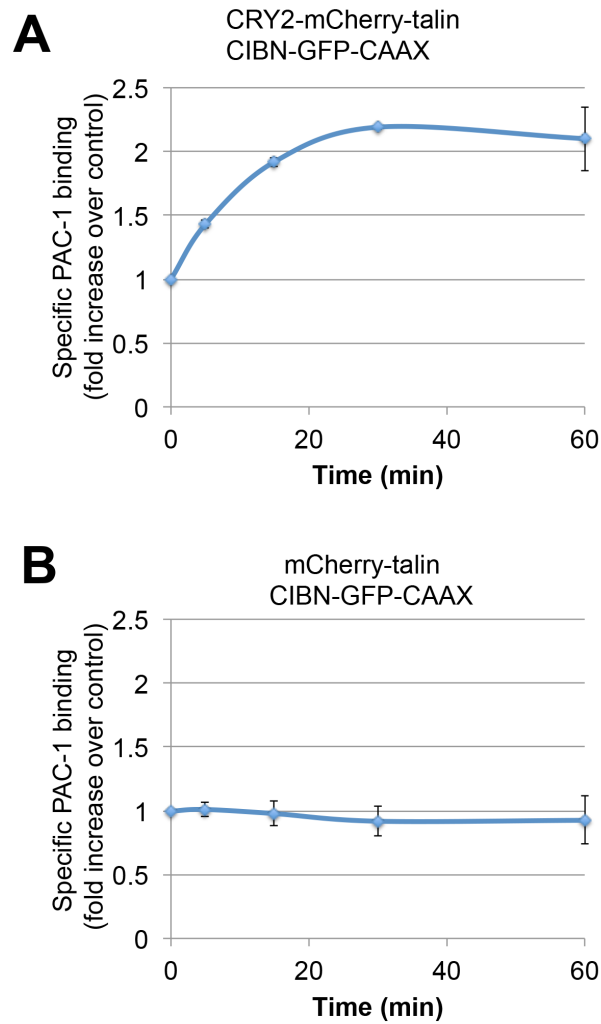

**Figure S3.** Time course of  $\alpha 11\beta 3$  activation (specific PAC-1 binding) in response to blue light in A5 CHO cells expressing CIBN-GFP-CAAX and either CRY2-mCherry-talin (**A**) or mCherry-talin (**B**). Cells in suspension were incubated with PAC-1 and illuminated with blue light for the indicated periods of time, followed by fixation with 3.7% formaldehyde and analysis by flow cytometry. Data represents specific PAC-1 binding normalized to binding observed with cells at zero time in the dark (means  $\pm$  SEM of three experiments).

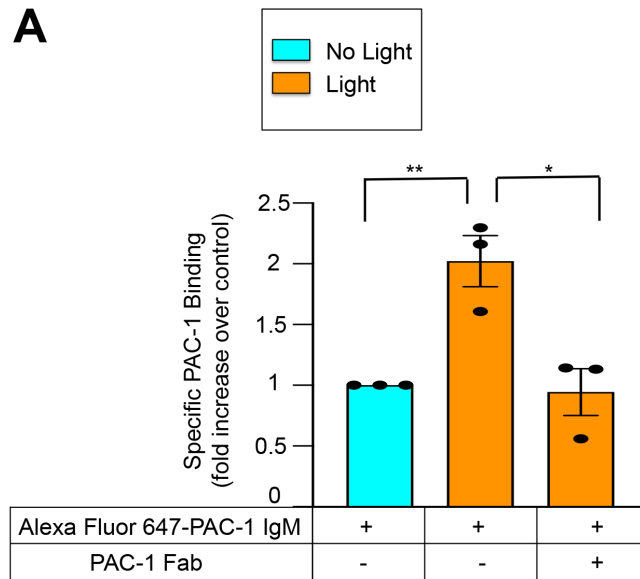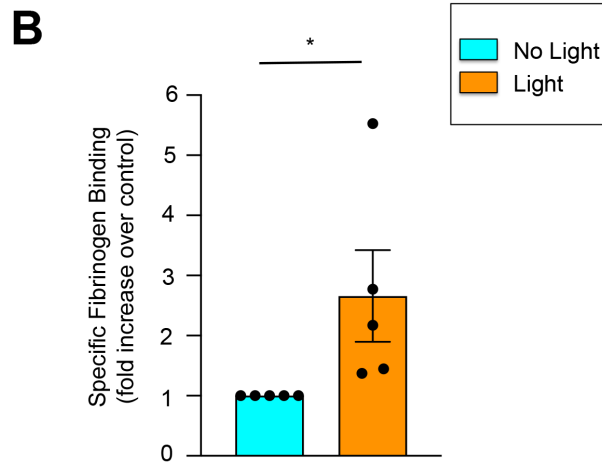

**Figure S4.** Translocation of full-length talin to the plasma membrane leads to increased  $\alpha$ IIb $\beta$ 3 affinity for fibrinogen. **(A)** Increased PAC-1 binding following optogenetic recruitment of CRY2-mCherry-talin to the plasma membrane was inhibited by PAC-1 Fab, a monovalent Fab fragment of PAC-1. Data represent means  $\pm$  SEM of three experiments (double asterisk,  $P < 0.01$ ; asterisk,  $P < 0.05$ ). **(B)** Optogenetic recruitment of talin to the plasma membrane promoted fibrinogen binding in A5 cells expressing CRY2-mCherry-talin and CIBN-GFP-CAAX. Specific fibrinogen binding was measured by flow cytometry as described in Experimental Procedures. Data represent means  $\pm$  SEM of five experiments (asterisk,  $P < 0.05$ ).

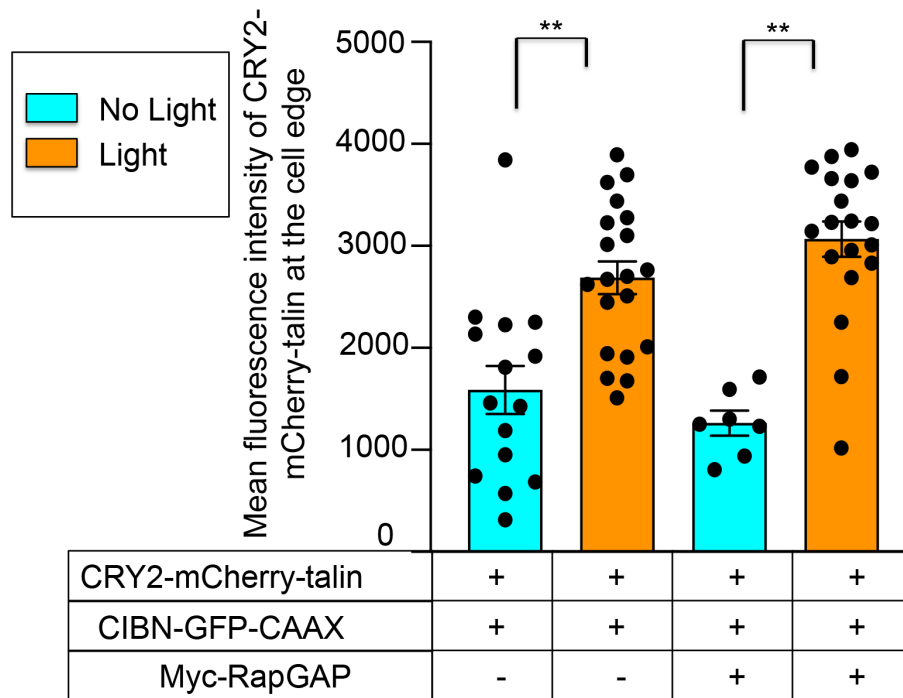

**Figure S5.** RapGAP does not affect optogenetic recruitment of talin to the plasma membrane in A5 cells. Lentivirus encoding Myc-tagged RapGAP was transduced into A5 cells stably expressing CRY2-mCherry-talin and CIBN-GFP-CAAX. Cells were trypsinized and resuspended before exposure to pulsed blue light for 30 minutes with a frequency of 1 s each 75 seconds. CIBN-GFP-CAAX and CRY2-mCherry-talin in fixed cells were visualized by confocal imaging. Recruitment of CRY2-mCherry-talin by CIBN-GFP-CAAX was quantified as described in Fig. S1. Data represent means  $\pm$  SEM from 7-20 cells in each of two independent experiments (double asterisk,  $P < 0.01$ ).

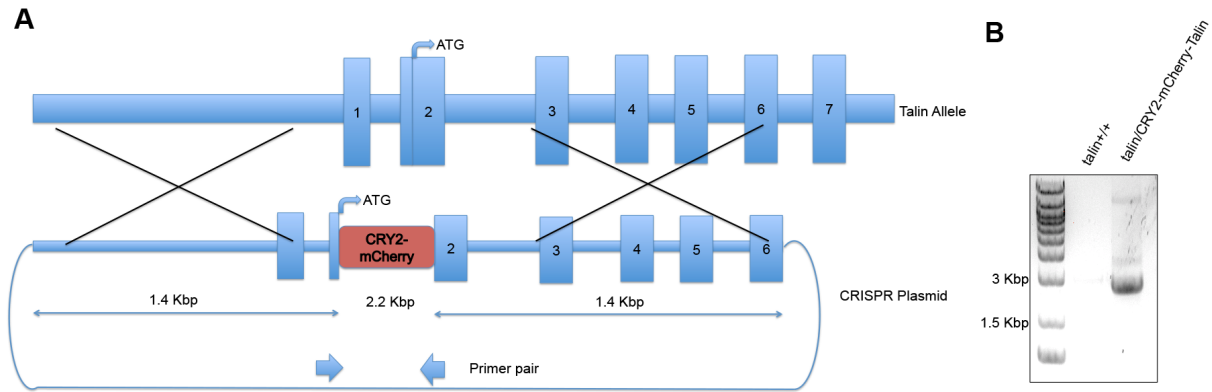

**Figure S6.** Expression of CRY2-mCherry-talin in immortalized murine lung endothelial cells following CRISPR-Cas9-based homology-directed repair. **(A)** Schematic of the CRISPR-Cas9 strategy to “tag” endogenous talin with CRY2-mCherry as described in Experimental Procedures. **(B)** A pair of primers that flank the CRY2-mCherry sequence was used to amplify and verify its insertion by PCR using genomic DNA as template. Primers covered portions from both CRY2-mCherry cDNA and exon 2 resulting in a PCR product size of ~2.3 Kbp.

**Fig. 2A**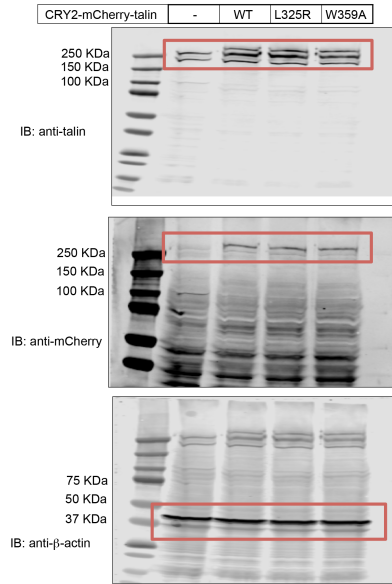**Fig. 3A**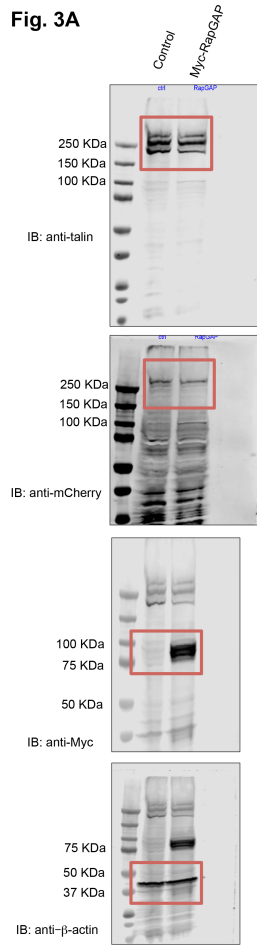**Fig. 5A**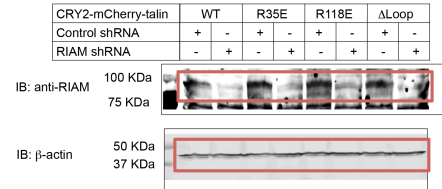**Fig. 4A**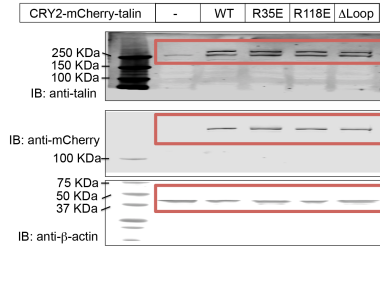**Fig. 6A**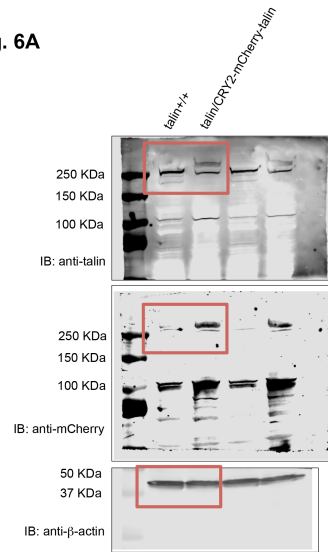

**Figure S7.** Uncropped images of western blots. The areas used in the indicated figures are shown within red boxes. A protein ladder is located on the far left of each gel. The molecular weights of the protein markers are labeled.
